# Supplementary material for: Aligning Oxygen Vacancies Oriently: Electric-Field Inducing Conductive Channels in TiO2 Film to boost Photocatalytic Conversion of CO2 into CO
Source: Research Square preprint supplement (doi:10.21203/rs.3.rs-104327/v1), 2020-11-16
Supplement: Supplementary file 1 [file 812963e3b2d10675179644b0.docx]

**Supplementary Information**

**Aligning Oxygen Vacancies Oriently: Electric-Field Inducing Conductive Channels in TiO2 Film to boost Photocatalytic Conversion of CO2 into CO**

Li *et al.*

**Supplementary Figures**

**
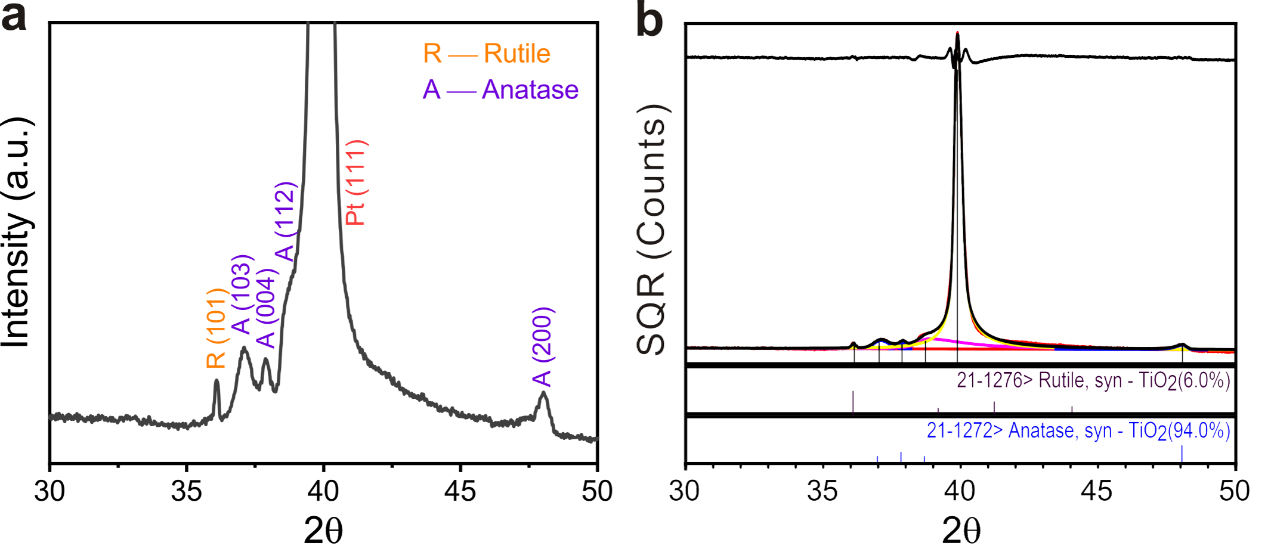
**

**Supplementary Fig. 1. XRD characteristic. a** XRD pattern of the sample and **b** the phase ratio analyzed by Jade for TiO2 film.


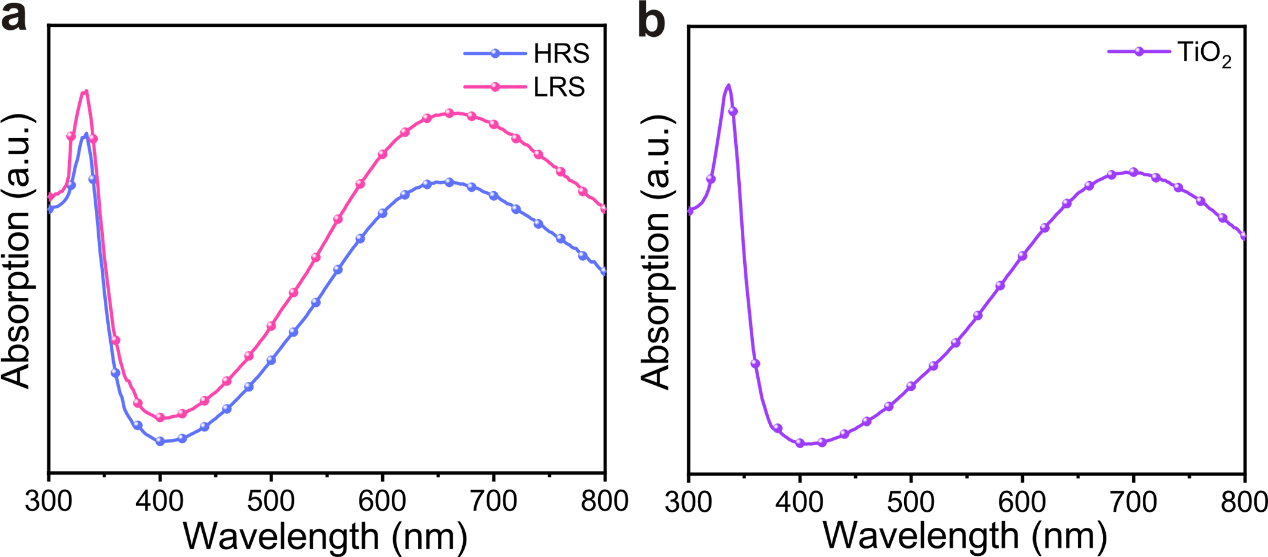


**Supplementary Fig. 2.** **Optical properties of samples.** The UV-vis diffuses reflectance spectra (DRS) of **a** LRS and HRS samples, as well as **b** TiO2 film without Au electrode. The absorption peak of pure TiO2 film is similar to that of HRS and LRS samples, implying that Au electrodes in this device have no effect on the absorption peak at 680 nm.

**
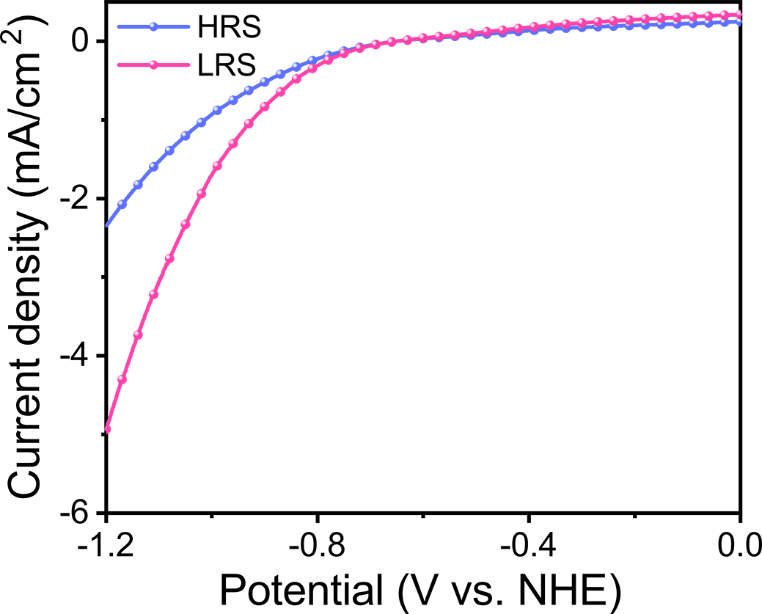
**

**Supplementary Fig. 3.** **The linear voltammetry scan curve of LRS and HRS samples.**


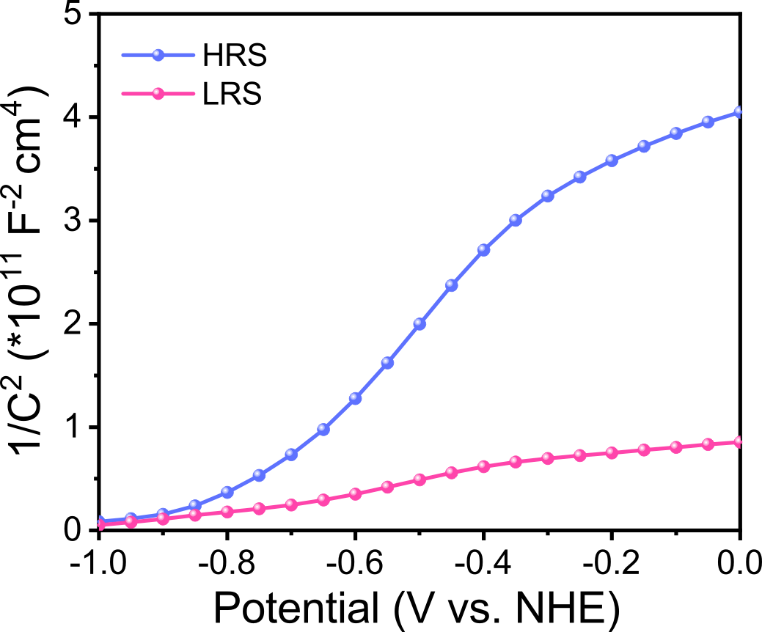


**Supplementary Fig. 4. Mott-Schottky plots of LRS and HRS samples.**


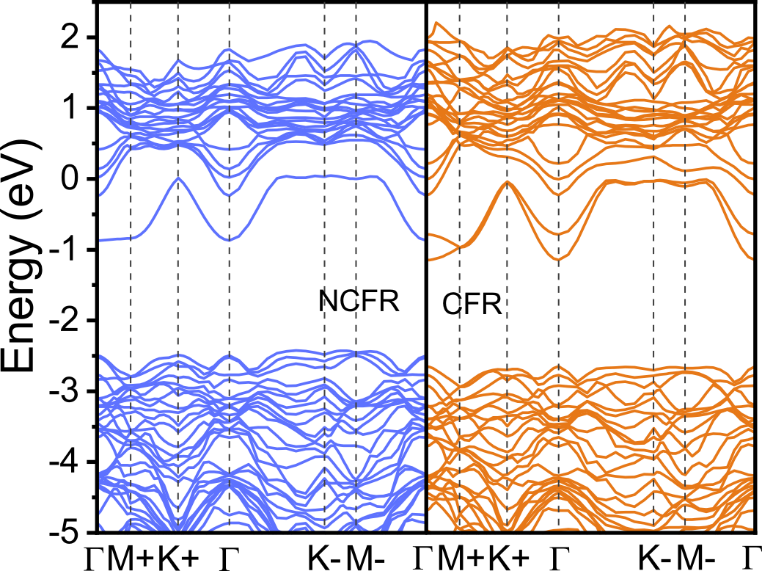


**Supplementary Fig. 5.** **Calculated band structure** **of TiO2** **with different OV concentrations.**

**Supplementary Tables**

**Supplementary Table 1**. **Ti3+/Ti4+ molar ratio and oxygen vacancy content of HRS and LRS samples.**

| Samples | Ti3+/Ti4+ (molar ratio) | O vacancy (%) |
| --- | --- | --- |
| HRS | 0.1317 | 6.9 |
| LRS | 0.1696 | 10.6 |
